# Supplementary material
Source: PubMed Central journal article supplement (PMC137550)
Supplement: pnas_222481199_3.pdf [file pnas_222481199_3.pdf]

Supporting information for Wiemels *et al.* (2002) *Proc. Natl. Acad. Sci. USA*, 10.1073/pnas.222481199.

**Table 4. IGH and TCR sequences from t(1;19) E2A-PBX1<sup>+</sup> patients**

Germ-line-derived V, D, and J segments are shown along with nontemplate N-nucleotides (N). Specific J and D segments are noted when homology was

**IgH**

| Pt. | V          | N                            | D                                                  | N                | J                     | F |
|-----|------------|------------------------------|----------------------------------------------------|------------------|-----------------------|---|
| 398 | TGCGA      | GGGAGACTACAGATAGTC           | (D2-2)AGAGATATTGTAGTAGTACCAGCTGCTAT                | CGCGGAGATT       | ACAACTGGTTCGACCCC(J5) | I |
| 913 | TGCCAG     | GATAC                        | (D3-22)ATTACTATGATAGTAGTGGTTACT                    | CCGG             | TGATGCTTTTGATATCT(J3) | I |
| 482 | TGCGCAGAG  |                              | (D2-2)AGTAGTACCAGTCTG                              | TGAGGG           | ACTGGTTCGTACCCCT(J5b) | O |
| 777 | TGCAAGA    | GCTCCATCTGGGATG              | (D2-2)GCAGCTGGT                                    | GGGG             | ATTACTACTACTACG(J6b)  | I |
| 697 | TGCGAGAGAA | CACCCCCTTGTGCCGATTCGGCTGAATG | (D3-22)TTACTATGATAGTAGTGGTTAT                      | TGGTGA           | ACTGGTACTTCGAT(J2)    | S |
| 348 | TGCGA      | AAGC                         | (D3-13)GGGGGAG GGGGGTGGGCGCATCAACAGTTCACCCACTTCATC | CGGTATGGA(J6b)   |                       | I |
| 228 | TGTACCAC   |                              | (D2-2)AGAAGTACCAGCTGC                              | GCCT             | TTTGACTACTGGGG(J4b)   | I |
| 633 | TGCGAGAGA  | GCTCCCTT                     | (D3-3)TTTTTGGAGTGGTTATTA                           | AGGGG            | TACTACTACTACGGTA(J6b) | I |
| 295 | TGCGAG     | TCGGGGT                      | (D6-13)GTACCAGCTGCT                                | TCGTACT          | ACTTTGACTACTGGGG(J4b) | I |
| 780 | TGCGAGAGA  | TAAAAATTCCC                  | (D3-22)TTACTACGATAGTAGTGGTTATT A                   | GTT              | ACTACTTTGACTACTG(J4b) | I |
| 69  | TGCAAGA    | GTTTCGCAAGCT                 | (D2-2)AGGATATTGTAGTAGTACCAGCTGC                    | CC               | TTACTACTACGGTAT(J6b)  | I |
| 498 | TGCGAGAG   | CCTCGGGCCACTA                | (D6-13)TATAGCAGCAGCTGGTAC                          | GGGT             | TGGTTCGACCCCTGGG(J5b) | I |
| 513 | TGCGAGAGA  | TGGTTGGCGTCAGGGTA            |                                                    |                  | ACTACTACTACTACGG(J6b) | I |
| RCH | TGCGAA     | GCGGACCCGGTC                 | (D5-18)GATACAGCTTATGGT                             | ATCG             | ACTGGGGCCAGGGA(J4b)   | O |
| 71  | TGCGAGA    | GGCGTCAGAAT                  | (D3-16)TTATGATTACATTTGGGGGAGTTATCGT                | CCAGAACCCAACCTAC | TTGACTACTGGGGC(J4b)   | I |
| 58  | TGCGA      | AAGCGGGGGAC                  | (D3-22)TATTACTATGATAGTAGTGGTT                      | ACATAAGGGG       | CTACTACTACTACGGT(J6b) | I |
| D1  | TGCAAGAG   | ATTTAC                       | (D2-2)ATTGTAGTAGTA                                 | CTGGCCCCCT       | CTTTGACTACTGGG(J4b)   | I |
| 416 | TCCGAGAGA  | TGAAGGGTCC                   | (D3-10)ATGGTTCGGGGAG                               | GAGC             | CTGGTTCGACCCCTG(J5b)  | I |
| 62  | TGCGAGAG   | CTCCAACCCCCCACCCTTTT         | (D2-15)TTGTAGTGGTGGTAGCTGCTACT                     | G                | ACAACTGGTTCGACCC(J5b) | I |
| D3  | TGCGAGA    | CATCCGGGC                    | (D5-18)TACAGCTATGGT                                | CCACAGGG         | TTACTACTACTACT(J6b)   | I |
| D4  | TGCGAGA    | TCCC GCCAGCAGG               | (D3-22)ATTACTATGATAGTAGTGGTTAT                     | CG               | TGAATACTTCCAGC(J1)    | I |
| S1  | TGCGA      | CCTAATCAGGC                  | (D3-10) GTATTACTATGGTTCG-GGGAG                     | CCTATAGGGGGAA    | TTGACTACTGGGG(J4b)    | S |

significant to assign one. Column “F” signifies whether the rearrangement encodes a functional gene. “I” – in frame and functional, “O” – out of frame and non functional, “S” – in frame but the rearrangement creates a stop codon.

**Table 4. (continued)**

| <b>TCR</b> |                              |                |                              |
|------------|------------------------------|----------------|------------------------------|
| <b>Pt.</b> | <b>V<math>\delta</math>2</b> | <b>N</b>       | <b>D<math>\delta</math>3</b> |
| 697        | TACTACTGTGCCTGTGACAC         | TCGGCGGA       | GGGGATACGCACAG               |
| 131A*      | TACTACTGTGCCTGTGACACC        | GAG            | CTGGGGGATACGCACAG            |
| 131B       | TAC TACTGTGCCT               | G              | CTGGGGGGATACGCACAG           |
| 780        | TACTACTGTG                   | CCTGTGCC       | CTGGGGGATACGCACAG            |
| 498        | TACTACTGTGCCTGTG             | CCCCTTGCTT     | ACTGGGGGATACGCACAG           |
| RCH        | TACTACTGTGCCTGTGACAC         | TTCGGC GGA     | GGGGATACGCACAG               |
| 71         | TACTACTGTGCCTGTGACACC        | TTCTGCCGCTGTTA | ACTGGGGGATACGCACAG           |
| 58         | TACTACTGTG                   | CCTGTCC        | CGCACAG                      |
| HS         | TACTACTGTGCCTGTGACACC        | GATTTA         | GGGGATACCGCACC               |
| BD         | TACTACTGTGCCTGTGACACC        | GGGA           | TGGGGGATACGCACAG             |
| 416        | TACTACTGTGCCTGTGAC           | GCC            | GGGGGATACGCACAG              |
| TG         | TACTACTGTGCCTGTGACACC        | GGGTCT         | ACTGGGGGATACGCACAG           |

\*A and B indicate two different sequences from separate clones in this patient.
